# Supplementary material
Source: PubMed Central journal article supplement (PMC9171658)
Supplement: jama-e228801-s002.pdf [file jama-e228801-s002.pdf]

\*Indicates required information. Only first name, last name, and suffix will appear in PubMed.

| <b>*Group Name(s): Chronic Kidney Disease Prognosis Consortium investigators and collaborators</b> |                   |                              |                  |                                                                                                               |                                          |                                                         |                                                                                            |
|----------------------------------------------------------------------------------------------------|-------------------|------------------------------|------------------|---------------------------------------------------------------------------------------------------------------|------------------------------------------|---------------------------------------------------------|--------------------------------------------------------------------------------------------|
| <b>*First Name and Middle Initial(s)</b>                                                           | <b>*Last Name</b> | <b>*Suffix (eg, Jr, III)</b> | Academic Degrees | Institution                                                                                                   | Location (city, state/province, country) | Role or Contribution, eg, chair, principal investigator | Group (if more than 1 Group listed in the byline) and/or Subgroup (eg, Steering Committee) |
| Morgan E                                                                                           | Grams             |                              | MD, PhD          | Johns Hopkins University                                                                                      | Baltimore, MD                            | CKD-PC Co-PI, DCC Director of Nephrology Initiatives    | AASK, ARIC, Steering Committee, Data Coordinating Center                                   |
| Andrew S                                                                                           | Levey             |                              | MD               | Tufts Medical Center                                                                                          | Boston, MA                               |                                                         | MDRD, Steering Committee                                                                   |
| Lesley A                                                                                           | Inker             |                              | MD               | Tufts Medical Center                                                                                          | Boston, MA                               |                                                         | MDRD                                                                                       |
| Michael                                                                                            | Shlipak           |                              | MD, MPH          | Kidney Health Research Collaborative, San Francisco Veterans Affairs Medical Center, University of California | San Francisco, CA                        |                                                         | MESA, CHS                                                                                  |
| Orlando M                                                                                          | Gutierrez         |                              | MD               | University of Alabama at Birmingham                                                                           | Birmingham, AL                           |                                                         | REGARDS, Steering Committee                                                                |
| Paul                                                                                               | Muntner           |                              | PhD, MPH         | University of Alabama at Birmingham                                                                           | Birmingham, AL                           |                                                         | REGARDS                                                                                    |
| Suzanne                                                                                            | Judd              |                              | PhD              | University of Alabama at Birmingham                                                                           | Birmingham, AL                           |                                                         | REGARDS                                                                                    |
| Katharine                                                                                          | Cheung            |                              | MD, PhD          | Larner College of Medicine, University of Vermont                                                             | Burlington, VT                           |                                                         | REGARDS                                                                                    |
| Josef                                                                                              | Coresh            |                              | MD, PhD          | Johns Hopkins University                                                                                      | Baltimore, MD                            | CKD-PC Co-PI, Steering Committee Chair                  | ARIC, Steering Committee, Data Coordinating Center                                         |
| Yingying                                                                                           | Sang              |                              | MSc              | Johns Hopkins University                                                                                      | Baltimore, MD                            | CKD-PC DCC Lead Programmer                              | ARIC, Data Coordinating Center                                                             |
| Nisha                                                                                              | Bansal            |                              | MD, MAS          | University of Washington                                                                                      | Seattle, WA                              |                                                         | CHS                                                                                        |
| Chi-yuan                                                                                           | Hsu               |                              | MD, MS           | School of Medicine, University of California                                                                  | San Francisco, CA                        |                                                         | CRIC                                                                                       |

## Supplemental Online Content: Nonauthor Collaborators

\*Indicates required information. Only first name, last name, and suffix will appear in PubMed.

| *First Name and Middle Initial(s) | *Last Name   | *Suffix (eg, Jr, III) | Academic Degrees | Institution                                                                | Location (city, state/province, country) | Role or Contribution, eg, chair, principal investigator | Group (if more than 1 Group listed in the byline) and/or Subgroup (eg, Steering Committee) |
|-----------------------------------|--------------|-----------------------|------------------|----------------------------------------------------------------------------|------------------------------------------|---------------------------------------------------------|--------------------------------------------------------------------------------------------|
| James                             | Sondheimer   |                       | MD               | Department of Internal Medicine, Wayne State University School of Medicine | Detroit, MI                              |                                                         | CRIC                                                                                       |
| Jonathan                          | Taliercio    |                       | DO               | Cleveland Clinic Foundation                                                | Cleveland, OH                            |                                                         | CRIC                                                                                       |
| Milda                             | Saunders     |                       | MD, MPH          | Department of Medicine, University of Chicago                              | Chicago, IL                              |                                                         | CRIC                                                                                       |
| Elizabeth                         | Selvin       |                       | PhD              | Johns Hopkins University                                                   | Baltimore, MD                            |                                                         | NHANES                                                                                     |
| Dan                               | Wang         |                       | MSc              | Johns Hopkins University                                                   | Baltimore, MD                            |                                                         | NHANES                                                                                     |
| Shoshana H                        | Ballew       |                       | PhD              | Johns Hopkins University                                                   | Baltimore, MD                            | CKD-PC Assistant Director                               | Steering Committee, Data Coordinating Center                                               |
| Ron T                             | Gansevoort   |                       | MD, PhD          | University of Groningen, Groningen                                         | Groningen, Netherlands                   |                                                         | Steering Committee                                                                         |
| Tsuneo                            | Konta        |                       | MD               | Yamagata University School of Medicine                                     | Yamagata, Japan                          |                                                         | Steering Committee                                                                         |
| Kunihiro                          | Matsushita   |                       | MD, PhD          | Johns Hopkins University                                                   | Baltimore, MD                            | CKD-PC DCC Director                                     | Steering Committee, Data Coordinating Center                                               |
| Kevan                             | Polkinghorne |                       | MD               | Monash Medical Centre, Melbourne                                           | VIC, Australia                           |                                                         | Steering Committee                                                                         |
| Elke                              | Schaffner    |                       | MD               | Institute of Public Health, Charité - Universitätsmedizin Berlin           | Berlin, Germany                          |                                                         | Steering Committee                                                                         |
| Jingsha                           | Chen         |                       | MSc              | Johns Hopkins University                                                   | Baltimore, MD                            | CKD-PC DCC Programmer                                   | Data Coordinating Center                                                                   |
| Aditya                            | Surapaneni   |                       | PhD              | Johns Hopkins University                                                   | Baltimore, MD                            | CKD-PC DCC Programmer                                   | Data Coordinating Center                                                                   |
| Mark                              | Woodward     |                       | PhD              | Johns Hopkins University                                                   | Baltimore, MD                            | CKD-PC DCC Statistician                                 | Data Coordinating Center                                                                   |
